# Supplementary material for: Dynein mutations impair autophagic clearance of aggregate-prone proteins
Source: Springer Nature journal article supplement (doi:10.1038/ng1591), 2005-06-26
Supplement: 41588_2005_BFng1591_MOESM1_ESM.pdf [file 41588_2005_BFng1591_MOESM1_ESM.pdf]

## Supplementary Figure 1

Dynein inhibition does not affect the clearance of wild-type  $\alpha$ -synuclein.

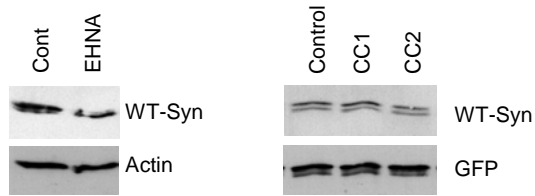

Dynein inhibition does not affect the clearance of wild-type  $\alpha$ -synuclein.

PC12 cells stably expressing wild-type  $\alpha$ -synuclein (WT-syn) were induced for 24 h after which the expression was switched off by removing doxycycline from the medium for the next 24 h. Cells were treated either with or without EHNA or were co-transfected with coiled-coil domains 1 or 2 of p150<sup>Glued</sup> (CC1, CC2) and pEGFP (3:1) during the switch-off period, after which they were harvested for western blot analysis. The blots were probed with anti-HA antibody to detect the transgene and anti-actin/anti-GFP as a loading control.
