# Supplementary material for: Dynein mutations impair autophagic clearance of aggregate-prone proteins
Source: Springer Nature journal article supplement (doi:10.1038/ng1591), 2005-06-26
Supplement: 41588_2005_BFng1591_MOESM2_ESM.pdf [file 41588_2005_BFng1591_MOESM2_ESM.pdf]

## Supplementary Figure 2

Polyglutamine-induced degeneration of adult photoreceptors is enhanced by mutations altering kinesin function.

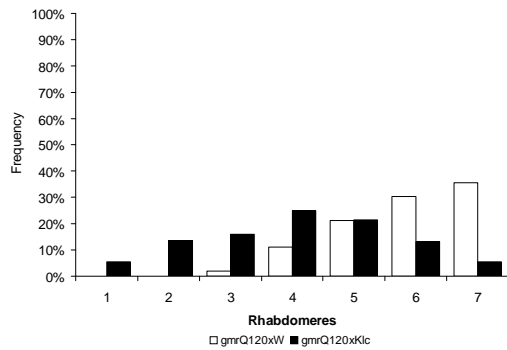

Polyglutamine-induced degeneration of adult photoreceptors is enhanced by mutations altering kinesin function.

Frequencies of ommatidia with different numbers of rhabdomeres, 3 days after eclosion, in progeny of flies expressing mutant huntingtin exon-1 (gmrQ120) crossed either to a control (white bars) or to kinesin light chain mutant<sup>5</sup> (black bars) flies ( $P \leq 0.0001$ ). The experiment was repeated 3 times with similarly significant results.
