# Supplementary material for: Dynein mutations impair autophagic clearance of aggregate-prone proteins
Source: Springer Nature journal article supplement (doi:10.1038/ng1591), 2005-06-26
Supplement: 41588_2005_BFng1591_MOESM3_ESM.pdf [file 41588_2005_BFng1591_MOESM3_ESM.pdf]

### Supplementary Figure 3

Inhibition of dynein decreases the proportion of cells with vimentin-encaged aggresomes.

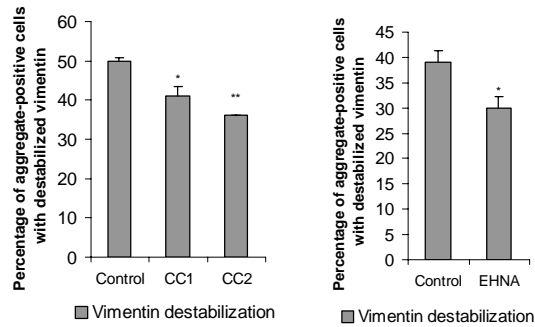

Inhibition of dynein decreases the proportion of cells with vimentin-encaged aggresomes.

COS-7 cells were co-transfected for 48 h either with GFP-Q74 and control, CC1 or CC2 (left panel) or GFP-Q74 alone (right panel). The cells on the right panel were treated either with (EHNA) or without EHNA (Control). After fixation, immunocytochemistry was performed using anti-vimentin antibody. The graph shows the proportion of Q74-expressing cells with aggregates that had vimentin cages around them (called “destabilized vimentin”), analysed as described in ref. 15 of main text, which also shows representative pictures of this phenomenon with our constructs.
