# Supplementary material for: Dynein mutations impair autophagic clearance of aggregate-prone proteins
Source: Springer Nature journal article supplement (doi:10.1038/ng1591), 2005-06-26
Supplement: 41588_2005_BFng1591_MOESM4_ESM.pdf [file 41588_2005_BFng1591_MOESM4_ESM.pdf]

## Supplementary Figure 4

p50 overexpression results in a change in morphology of Q74 aggregates.

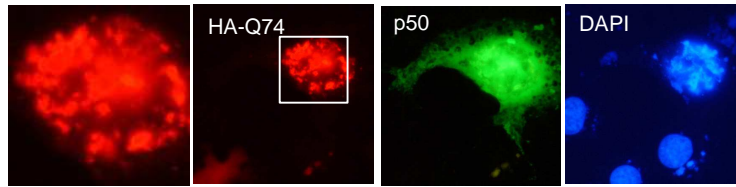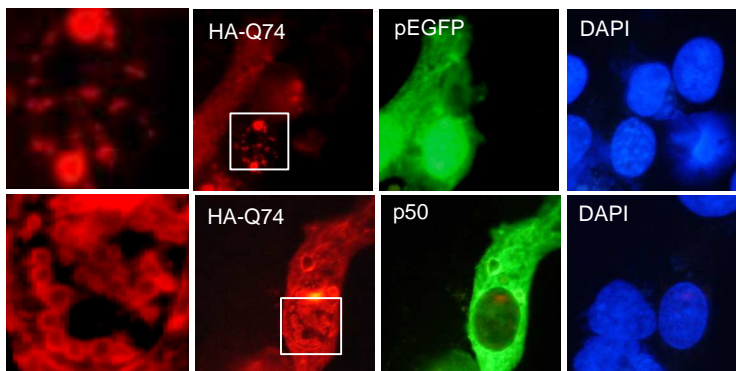

p50 overexpression results in a change in morphology of Q74 aggregates.

Immunocytochemistry of COS-7 cells co-transfected for 48 h with HA-Q74 (red) and pEGFP or p50 (green). Panels on left are magnifications of boxes on second panels. Boxes are same size. Examples of fragmented nuclei in p50-overexpressing cells (top panel) and nuclei in cells overexpressing p50 but treated with Z-VAD-fmk (a broad spectrum caspase inhibitor) (bottom two panels), are shown.
